# Supplementary material
Source: PubMed Central journal article supplement (PMC6314849)

## Supporting Information

# Examination of Endogenous Peptides in *Medicago truncatula* using Mass Spectrometry Imaging

Erin Gemperline<sup>1</sup>, Caitlin Keller<sup>1</sup>, Junko Maeda<sup>2</sup>, Dhileepkumar Jayaraman<sup>2</sup>, Michael Sussman<sup>3</sup>,  
Jean-Michel Ané<sup>2</sup>, Lingjun Li<sup>1,4,\*</sup>

<sup>1</sup>Department of Chemistry, University of Wisconsin - Madison, Madison, WI 53706, USA.

<sup>2</sup>Department of Agronomy, University of Wisconsin - Madison, Madison, WI 53706, USA.

<sup>3</sup>Department of Biochemistry, University of Wisconsin - Madison, Madison, WI 53706, USA

<sup>4</sup>School of Pharmacy, University of Wisconsin - Madison, Madison, WI 53705, USA.

\*Address reprint requests to:

Dr. Lingjun Li, School of Pharmacy & Department of Chemistry, University of Wisconsin, 777  
Highland Ave, Madison, WI 53705.

E-mail: [lingjun.li@wisc.edu](mailto:lingjun.li@wisc.edu). Phone: (608)265-8491, Fax: (608)262-5345.

## Contents

**Figure S1:** Photographs comparing DHB and CHCA matrix application on root nodule slices

**Figure S2:** Annotated MS/MS spectra from *de novo* sequencing.

**Figure S3:** Annotated MS/MS spectra of unique peptides.

**Table S1:** *m/z* Values Detected in Medicago Mature Nodules (DHB matrix)

**Table S2:** *m/z* Values Detected in Medicago Seedlings (DHB matrix)

**Table S3:** *m/z* Values Detected in Medicago Mature Nodules (CHCA matrix)

**Table S4:** *m/z* Values Detected in Medicago Seedlings (CHCA matrix)

**Figure S1:** Photographs comparing DHB and CHCA matrix application on root nodule slices

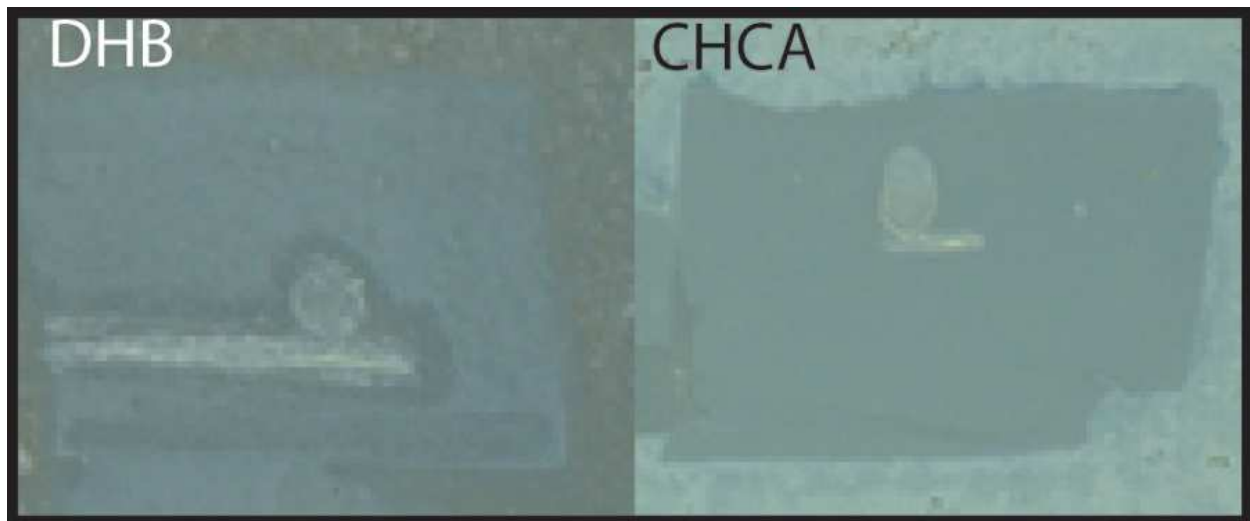

**Figure S2: Annotated MS/MS spectra from *de novo* sequencing.**

MW 908.4238 LC-MS/MS ALC=82%

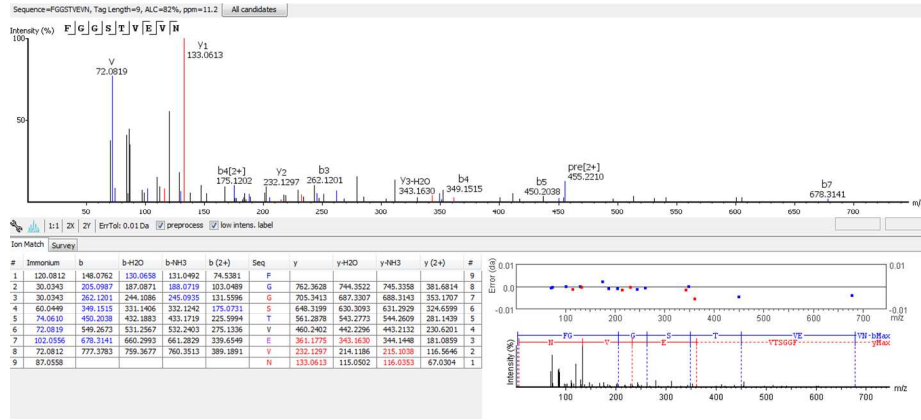

MW 962.4813 LC-MS/MS ALC=69%

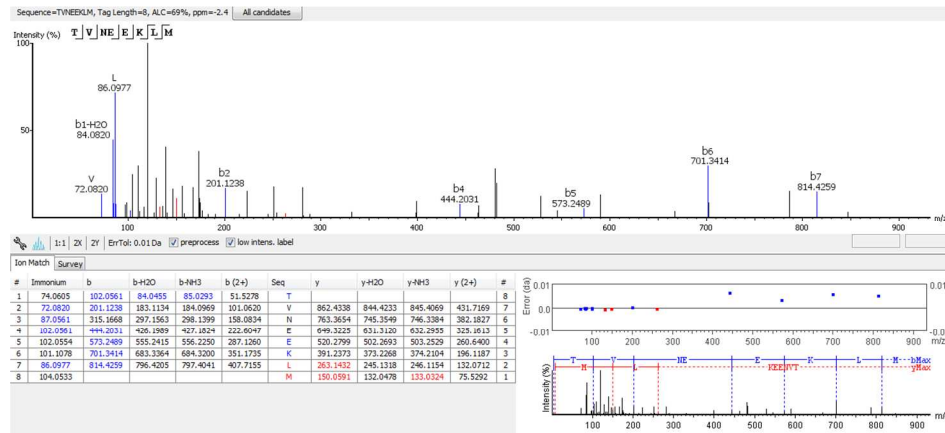

MW 990.5163 LC-MS/MS ALC=71%

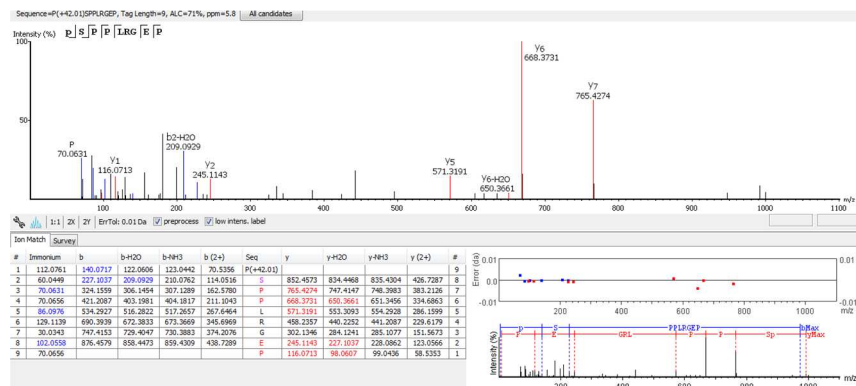

MW 990.5163 LC-MS/MS ALC=65%

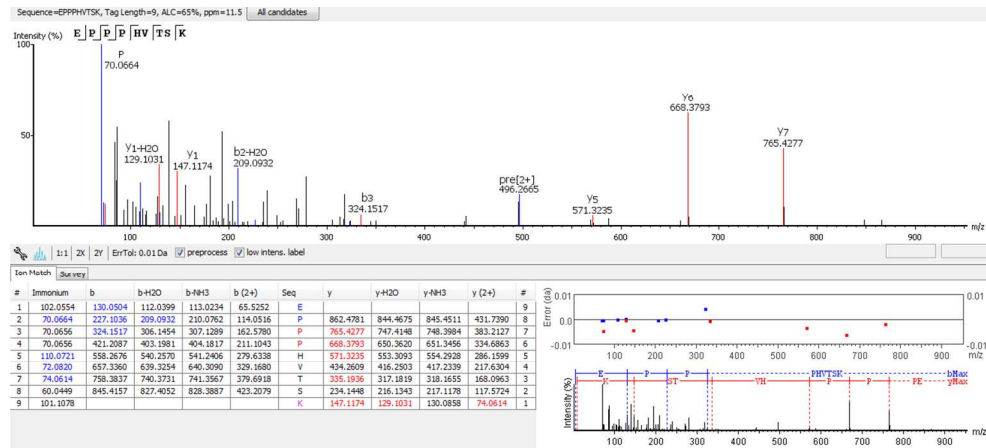

MW 1006.5114 LC-MS/MS ALC=60%

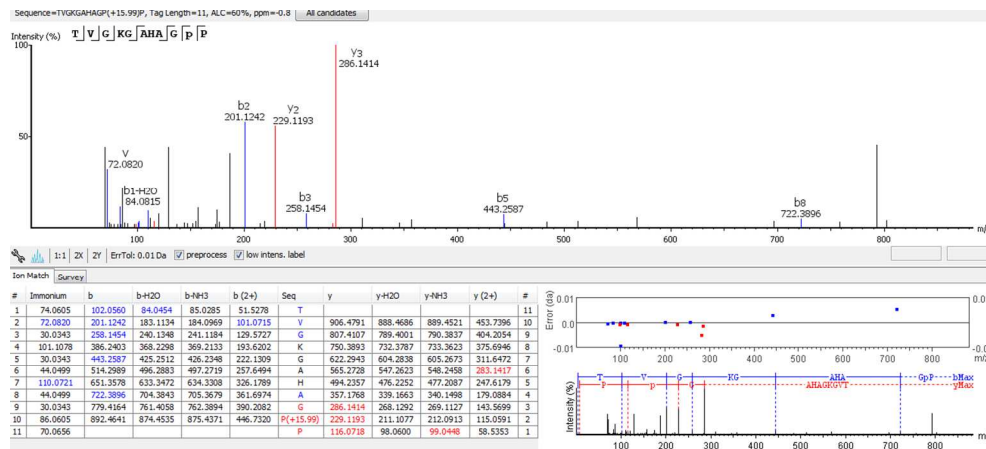

MW 1008.4694 LC-MS/MS ALC=67%

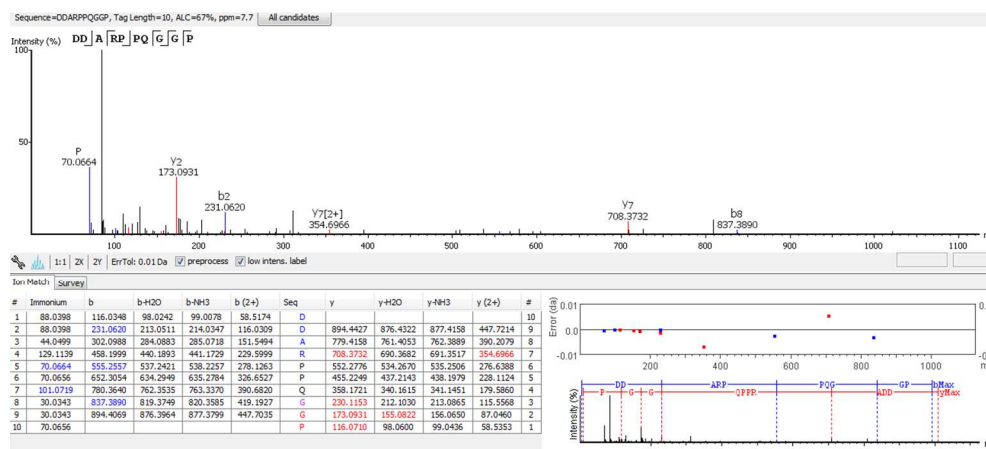

MW 1021.5575 LC-MS/MS ALC=54%

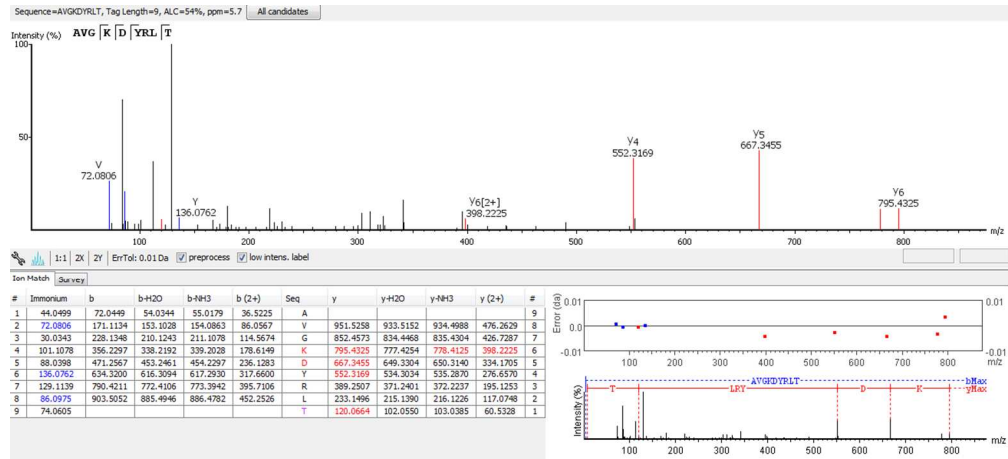

MW 1068.5733 LC-MS/MS ALC=90%

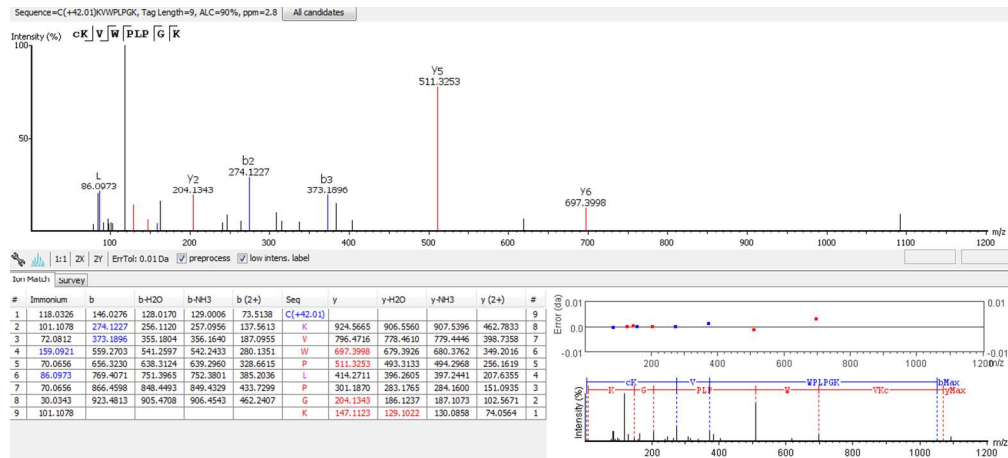

MW 1068.5733 LC-MS/MS ALC=89%

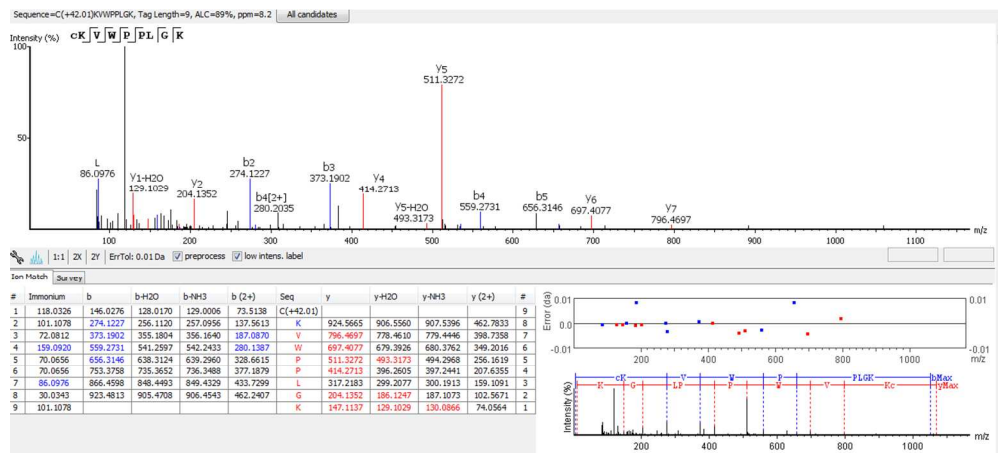

MW 1094.5280 LC-MS/MS ALC=73%

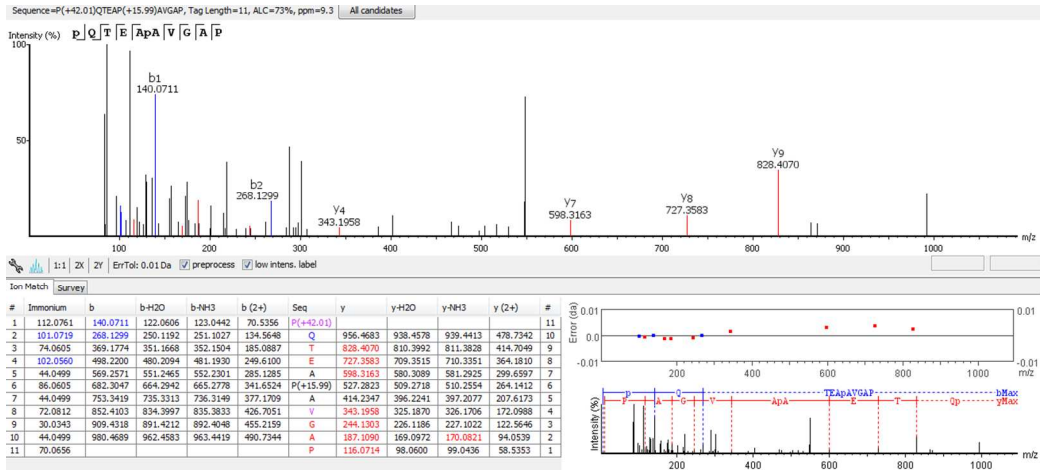

MW 1106.5081 LC-MS/MS ALC=98%

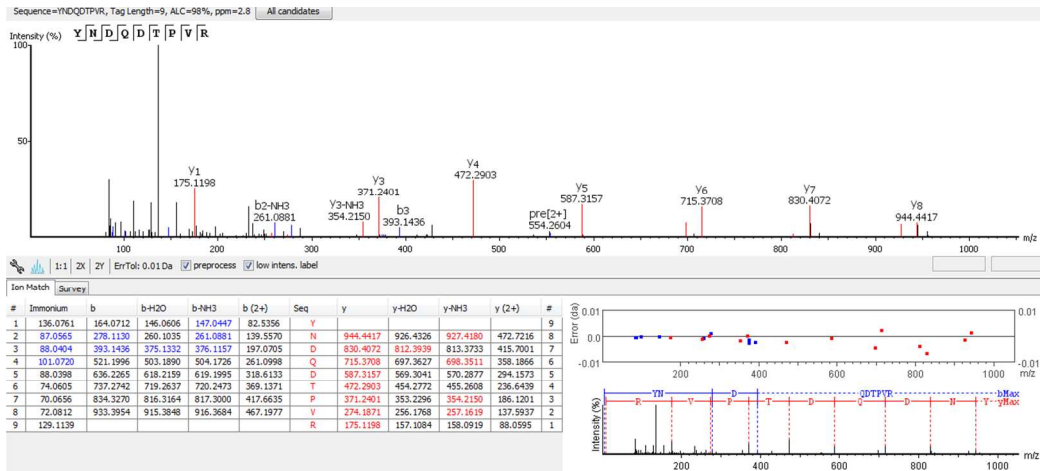

MW 1106.5255 LC-MS/MS ALC=71%

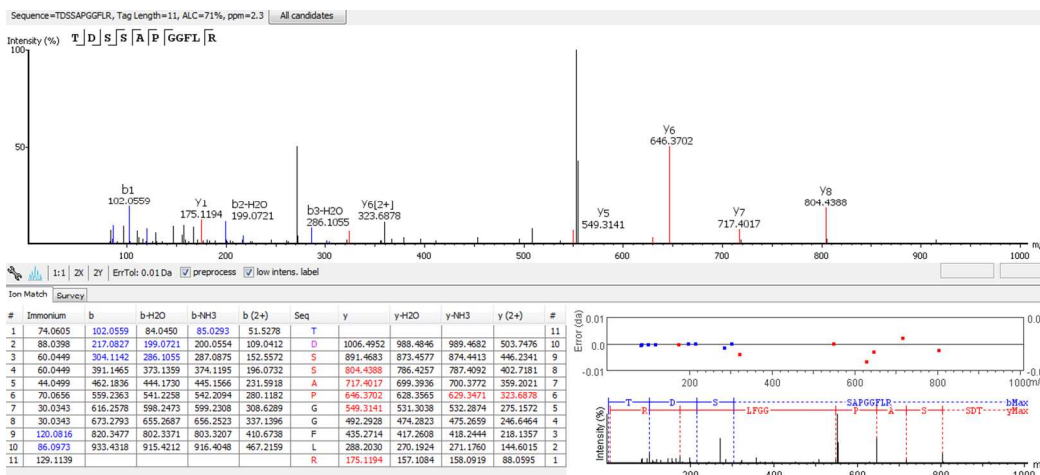

MW 1112.5974 LC-MS/MS ALC=81%

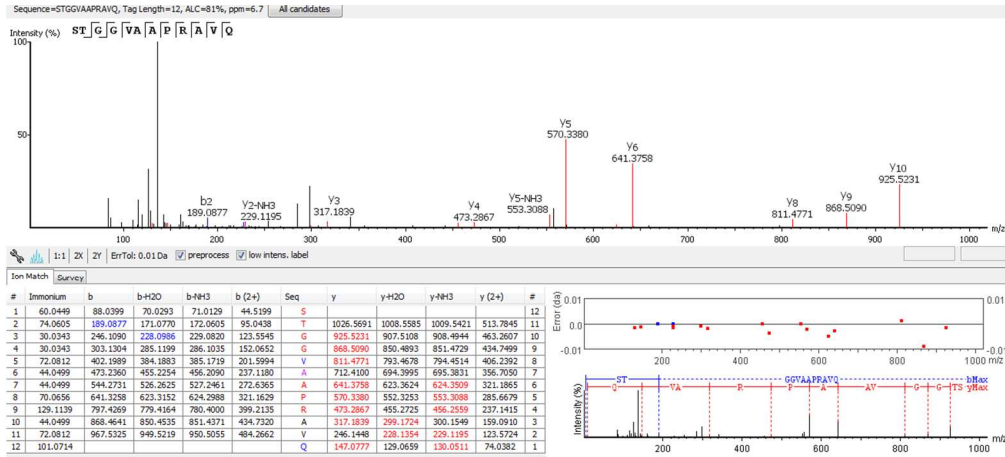

MW 1112.5974 LC-MS/MS ALC=73%

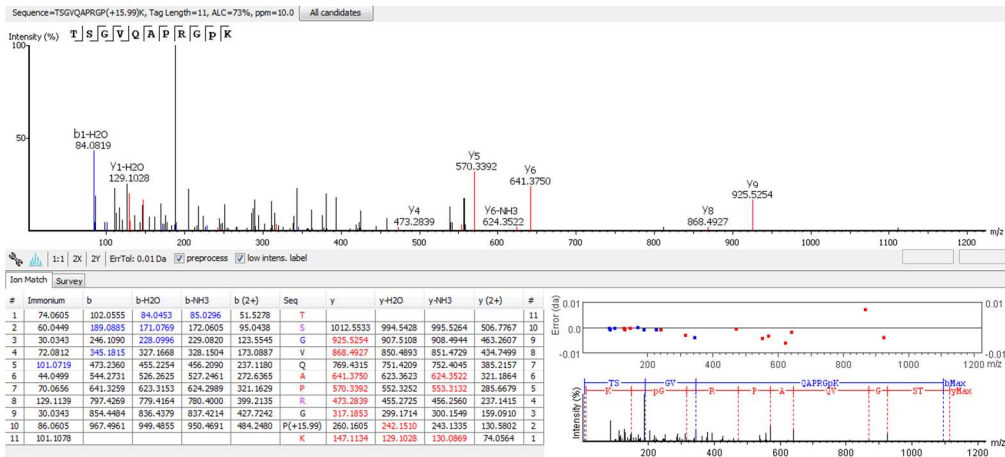

MW 1159.6191 LC-MS/MS ALC=92%

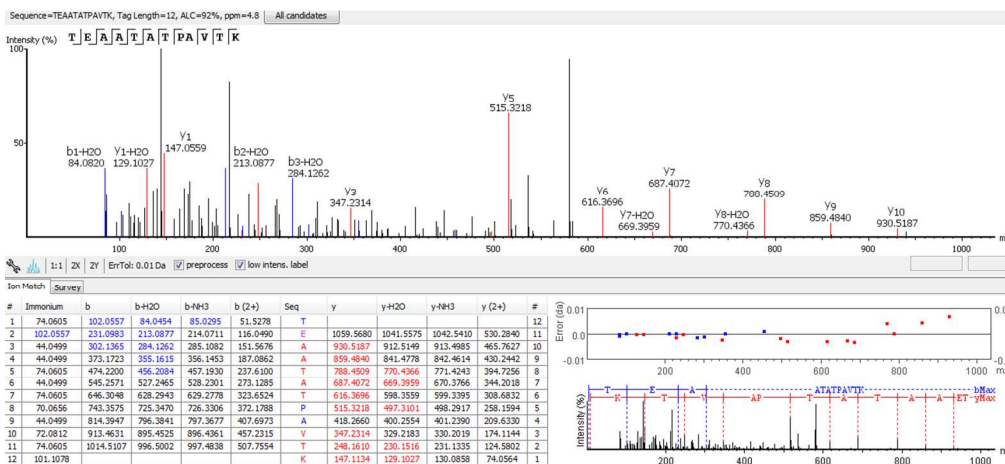

MW 1170.6070 LC-MS/MS ALC=91%

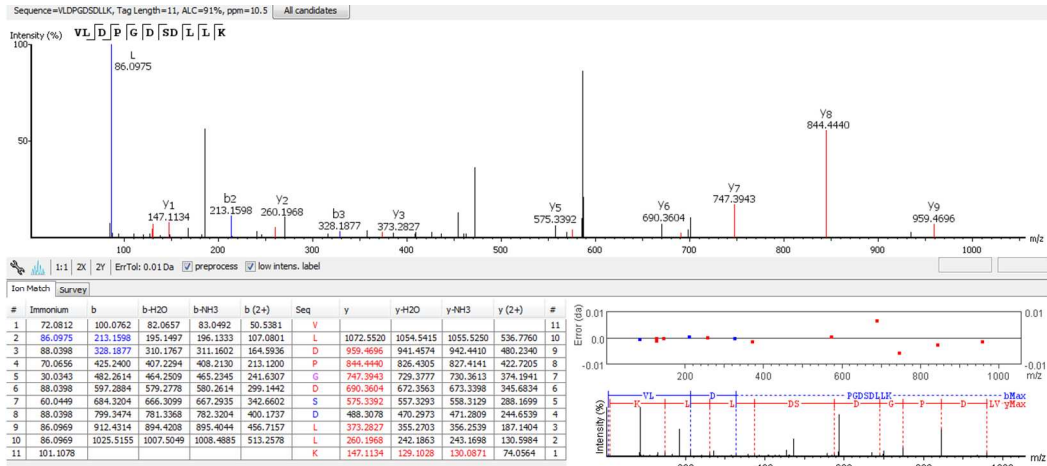

MW 1170.6070 LC-MS/MS ALC=89%

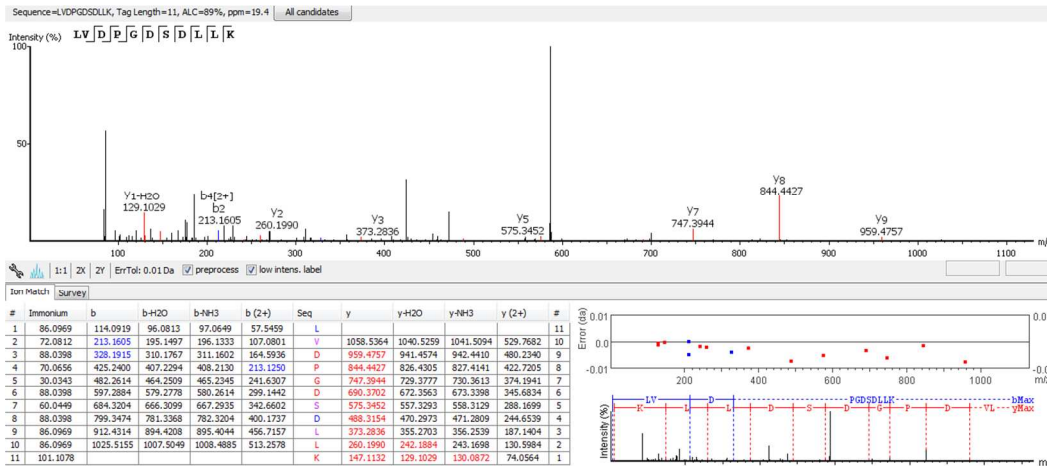

MW 1170.6070 LC-MS/MS ALC=78%

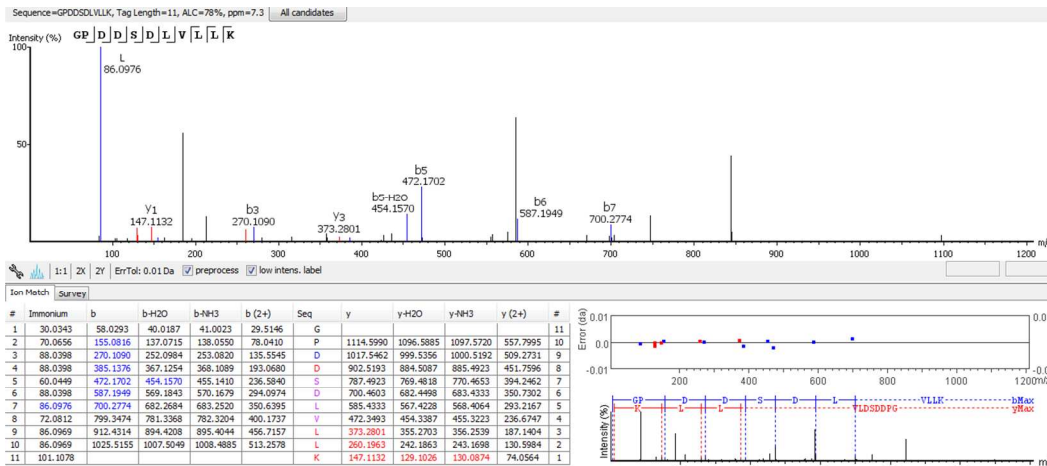



MW 1170.6070 LC-MS/MS ALC=75%

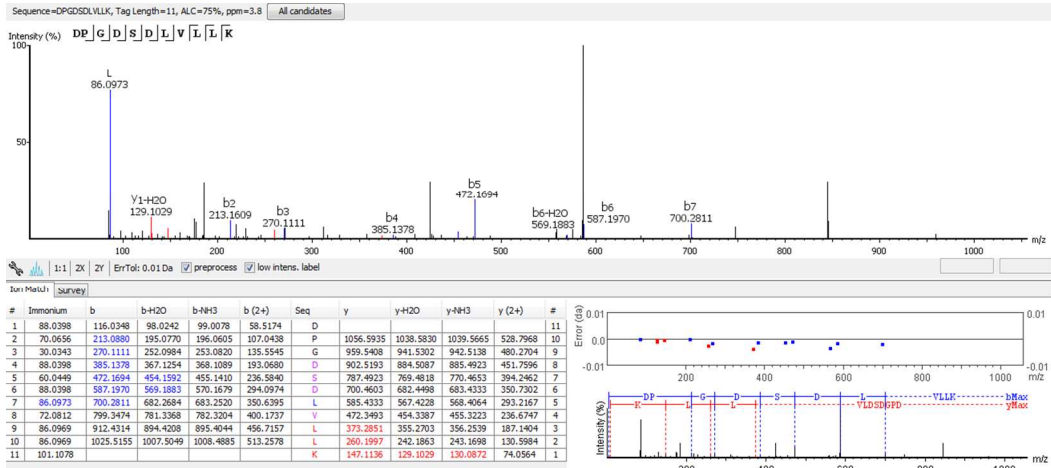

MW 1170.6070 LC-MS/MS ALC=56%

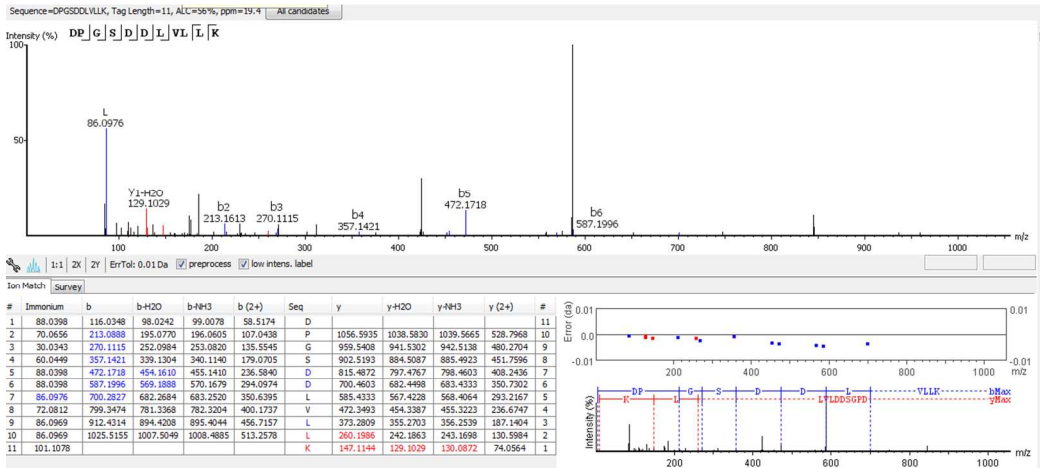

MW 1175.5925 LC-MS/MS ALC=69%

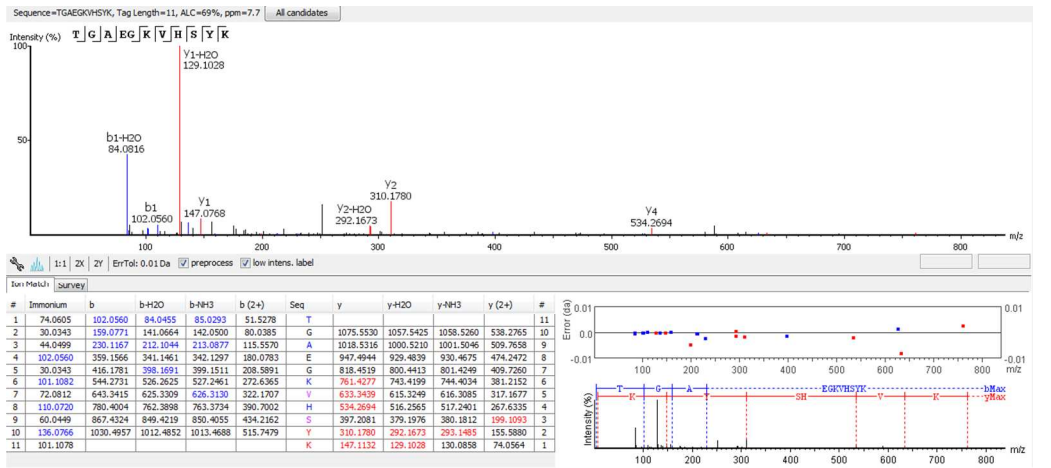

MW 1179.6039 LC-MS/MS ALC=86%

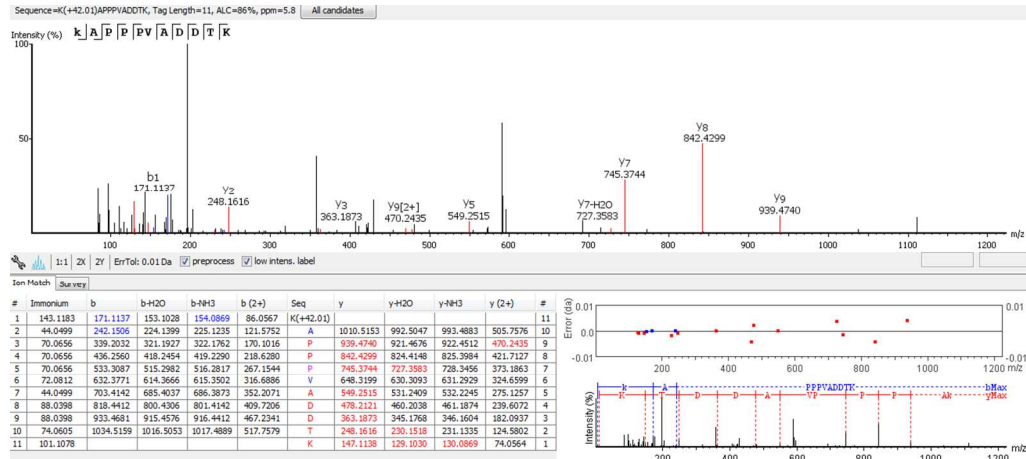

MW 1186.5763 LC-MS/MS ALC=70%

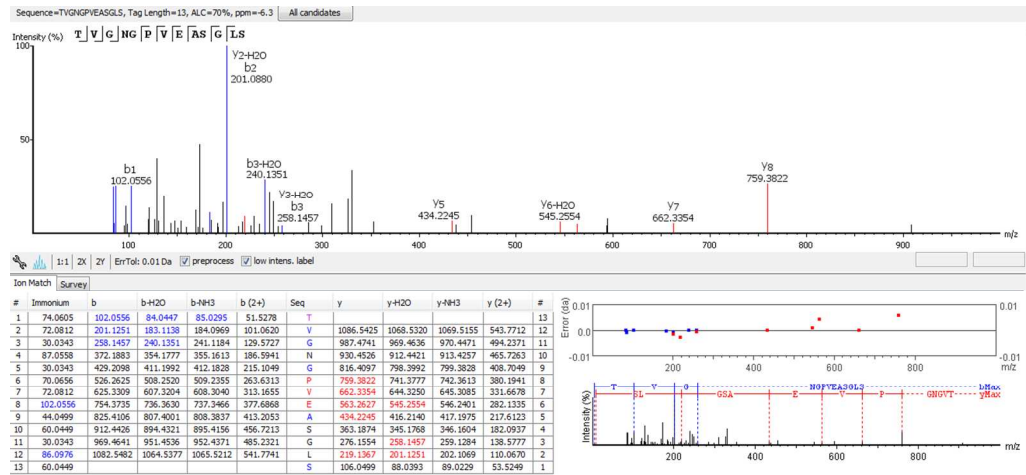

MW 1192.5108 LC-MS/MS ALC=62%

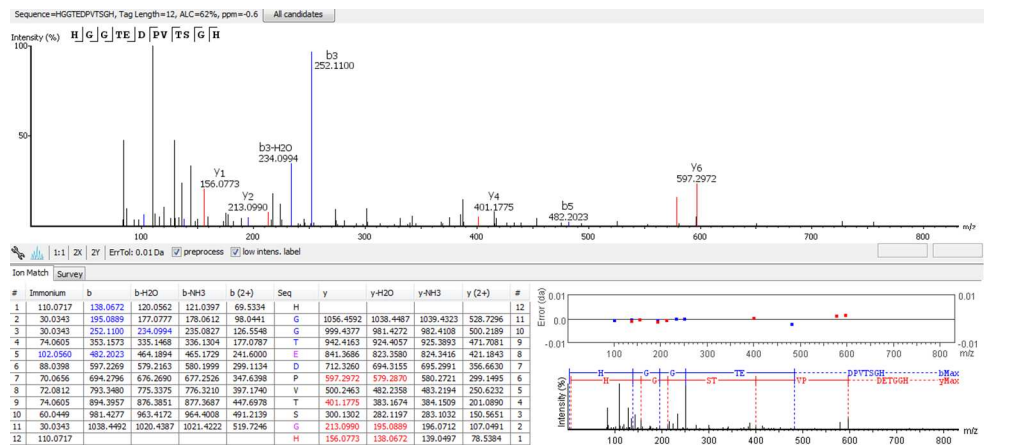

MW 1300.6790 LC-MS/MS ALC=52%

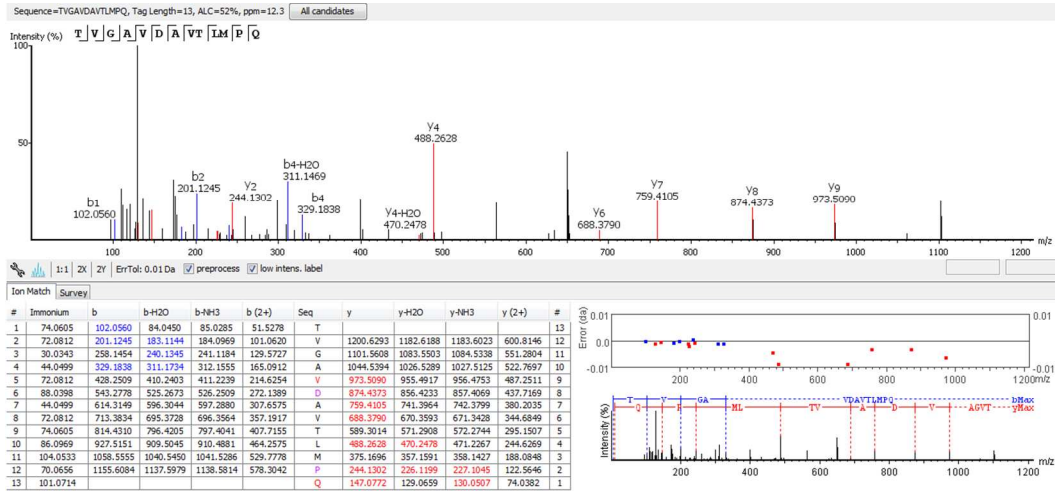

MW 1300.6790 LC-MS/MS ALC=53%

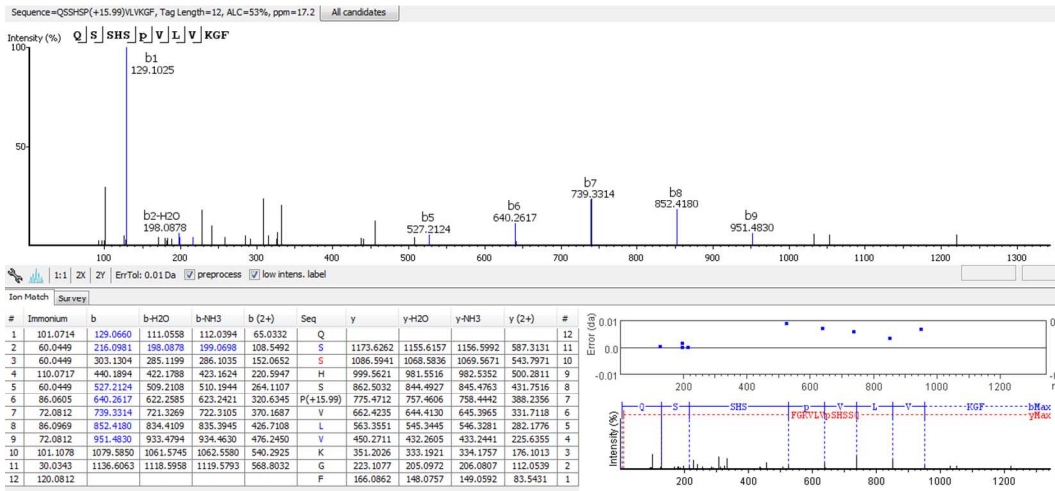

MW 1308.6282 LC-MS/MS ALC=83%

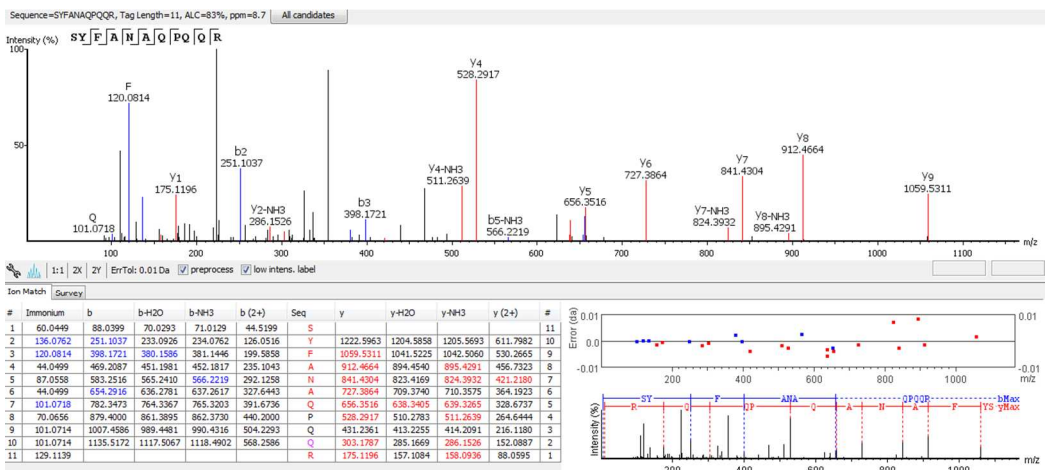

MW 1342.6713 LC-MS/MS ALC=67%

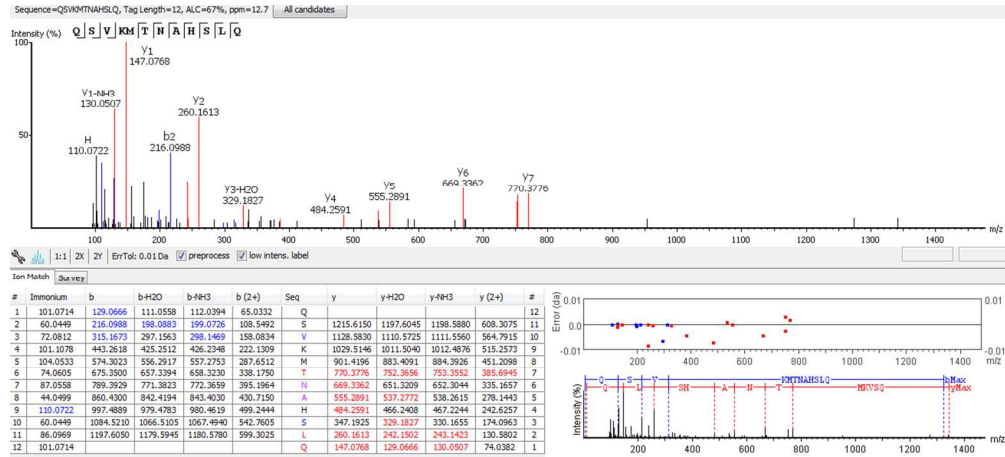

MW 1376.7577 LC-MS/MS ALC=51%

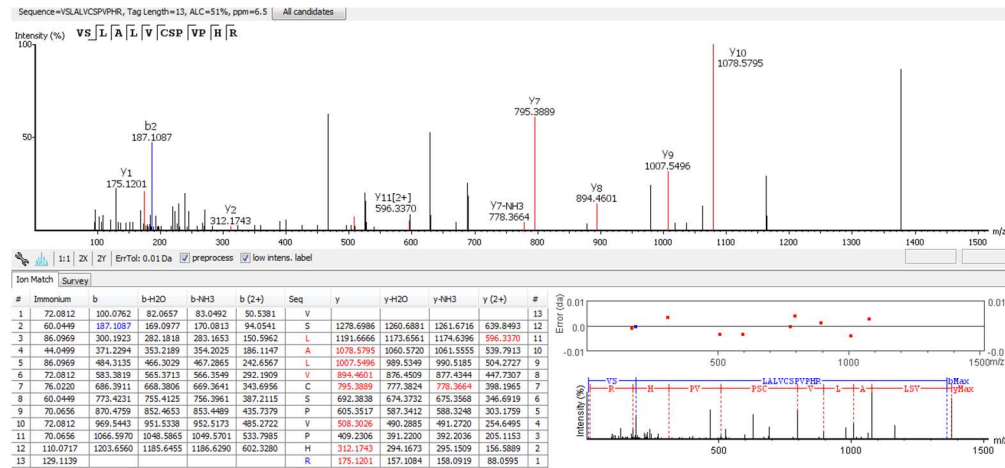

MW 1728.9683 LC-MS/MS ALC=53%

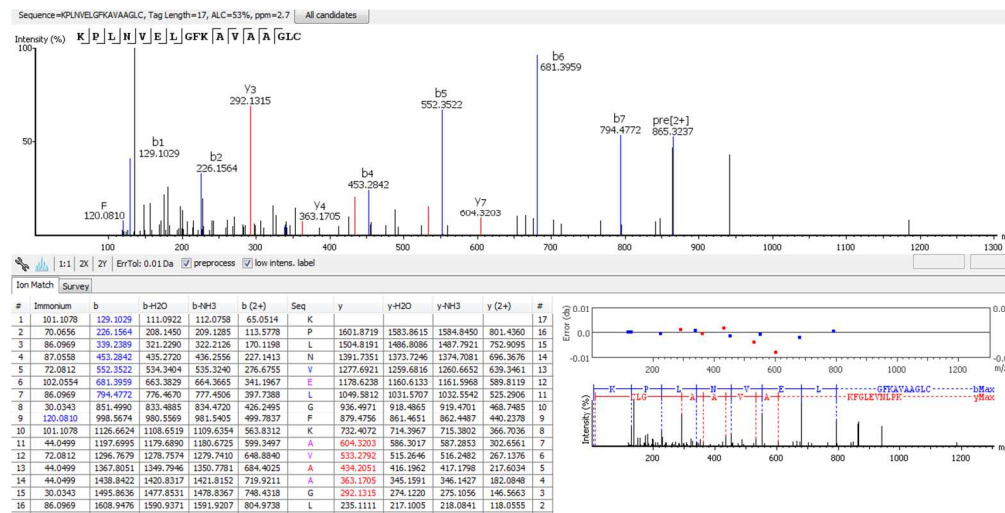

**Figure S3: Annotated MS/MS spectra of unique peptides.**

*m/z* 1132.53084, Wound-inducible Basic Family Protein  
LC-MS/MS -10lgP=24.3

MALDI-MSI

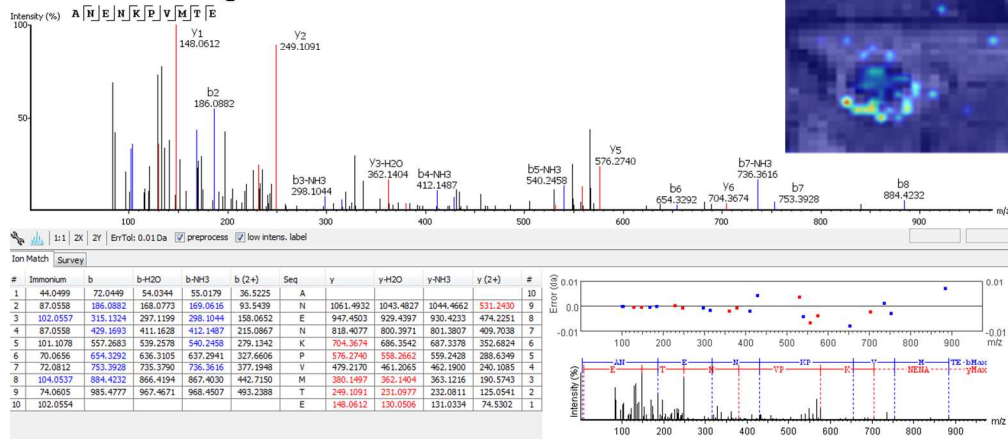

*m/z* 1162.59554, Low-temperature Inducible/ Nodulin-like Protein  
LC-MS/MS -10lgP=29.2

MALDI-MSI

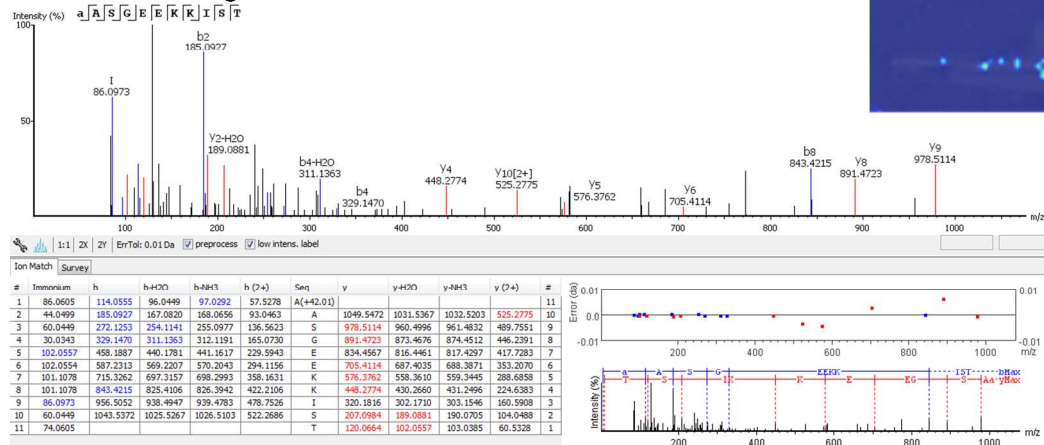

*m/z* 1171.62114, 60S Ribosomal Protein L30  
LC-MS/MS -10lgP=27.54

MALDI-MSI

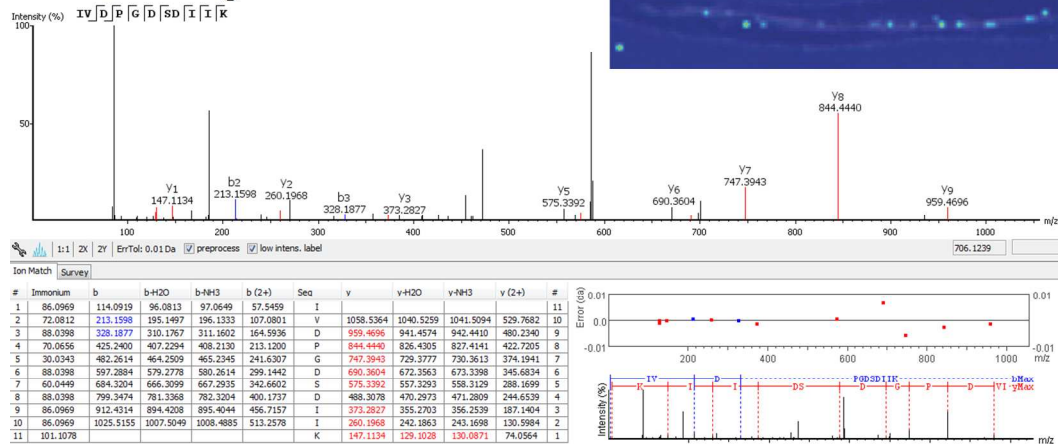

*m/z* 1180.62144, Carboxy-terminal Region Remorin  
LC-MS/MS -10lgP=32.68

MALDI-MSI

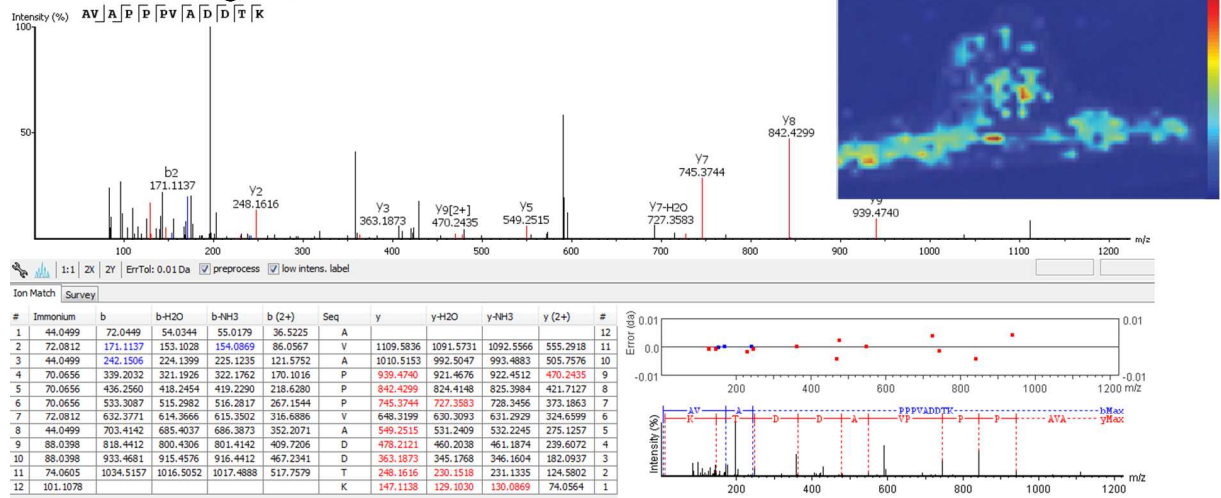

*m/z* 1293.67314, Ferritin  
LC-MS/MS -10lgP=27.38

MALDI-MSI

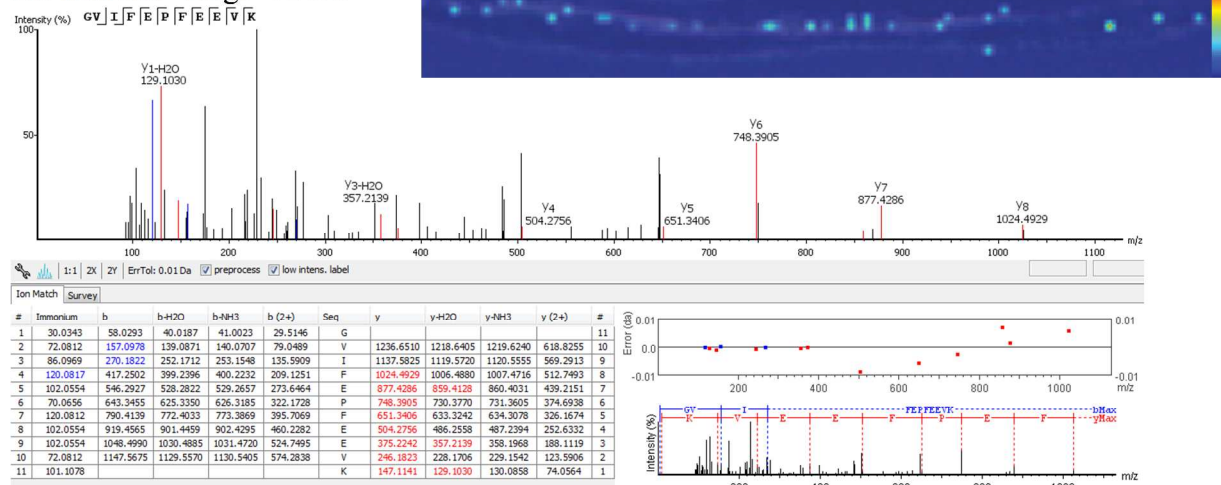

LC-MS/MS -10lgP=27.38

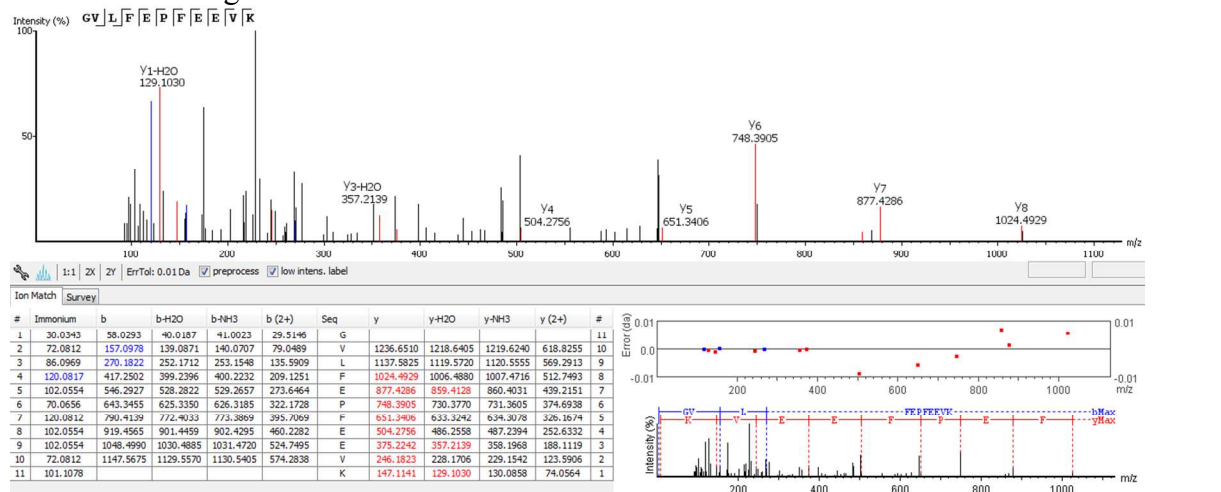

*m/z* 1483.75454, Ribulose Biphosphate Carboxylase/ Oxygenase Large Chain Domain Protein MALDI-MSI

LC-MS/MS -10lgP=35.64

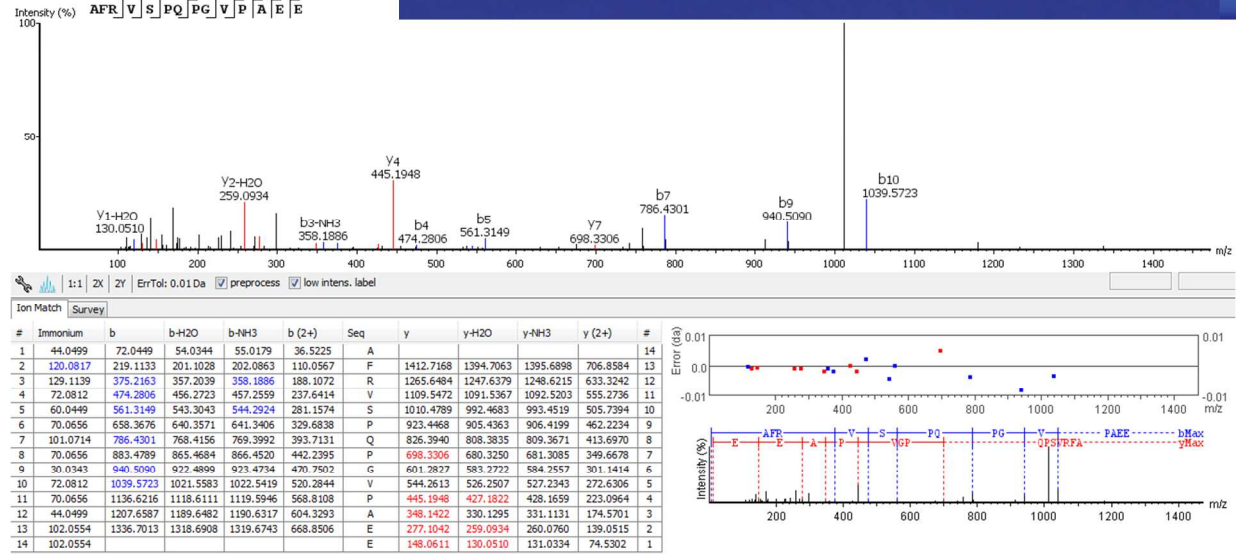

*m/z* 1976.02434, Basic 7S Globulin/ Peptidase A1, Pepsin MALDI-MSI

LC-MS/MS -10lgP=29.66

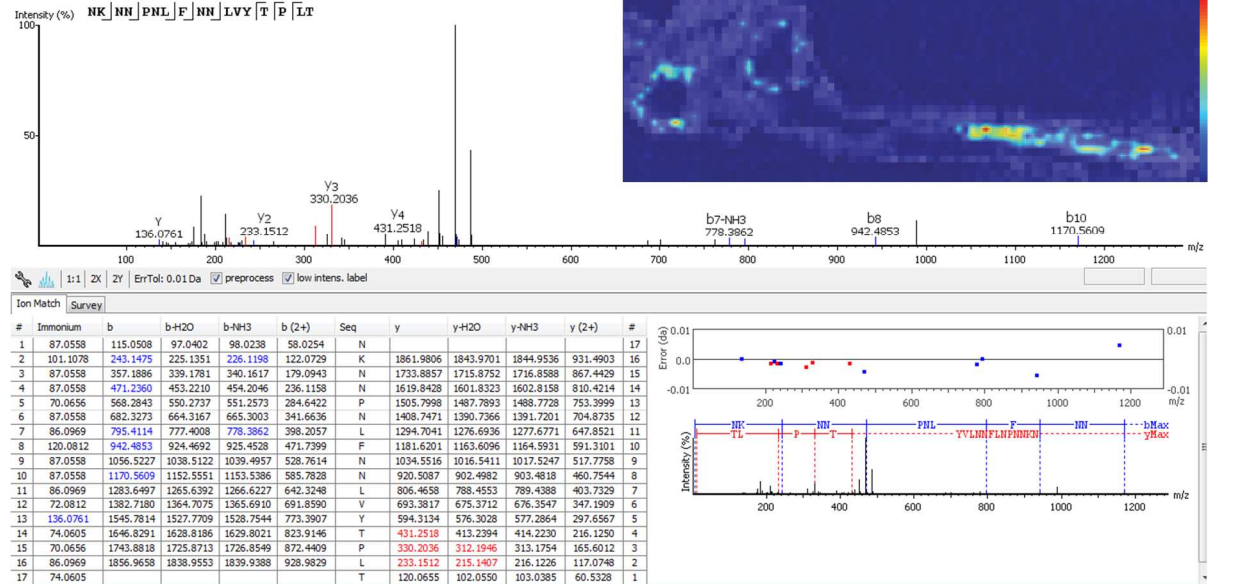

Supplement: NIHMS1001511-supplement-Supplementary_Figures.pdf [file NIHMS1001511-supplement-Supplementary_Figures.pdf]
